# Supplementary material for: Probing the Anticancer Action of Novel Ferrocene Analogues of MNK Inhibitors
Source: PubMed Central journal article supplement (PMC6225114; doi:10.3390/molecules23092126), 2018-08-23
Supplement: molecules-23-02126-s001.pdf [file molecules-23-02126-s001.pdf]

*Supplementary Material:*

## **Probing the Anticancer Action of Novel Ferrocene Analogues of MNK Inhibitors.**

**Supojanee Sansook<sup>1,2#</sup>, Ella Lineham<sup>3#</sup>, Storm Hassell-Hart<sup>1</sup>, Graham J. Tizzard<sup>4</sup>, Simon J. Coles<sup>4</sup>, John Spencer<sup>1\*</sup> and Simon J. Morley<sup>3\*</sup>**

<sup>1</sup> Department of Chemistry, School of Life Sciences, University of Sussex, Falmer, Brighton, East Sussex, BN1 9QJ, UK; [sansook\\_s@yahoo.com](mailto:sansook_s@yahoo.com) (S.S.); [S.Hassell-Hart@sussex.ac.uk](mailto:S.Hassell-Hart@sussex.ac.uk) (S.H.H.).

<sup>2</sup> Faculty of Science and Technology, Princess of Naradhiwas University, Thailand, 96000.

<sup>3</sup> Department of Biochemistry, School of Life Sciences, University of Sussex, Falmer, Brighton, BN1 9QG, UK; [e.lineham@sussex.ac.uk](mailto:e.lineham@sussex.ac.uk) (E.L.).

<sup>4</sup> UK National Crystallography Service, Chemistry, Faculty of Natural and Environmental Sciences, University of Southampton, Southampton, SO17 1BJ. UK; [Graham.Tizzard@soton.ac.uk](mailto:Graham.Tizzard@soton.ac.uk) (G. J. T.); [S.J.Coles@soton.ac.uk](mailto:S.J.Coles@soton.ac.uk) (S. J. C.).

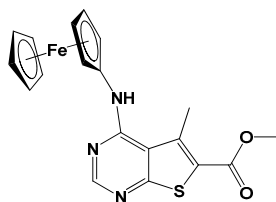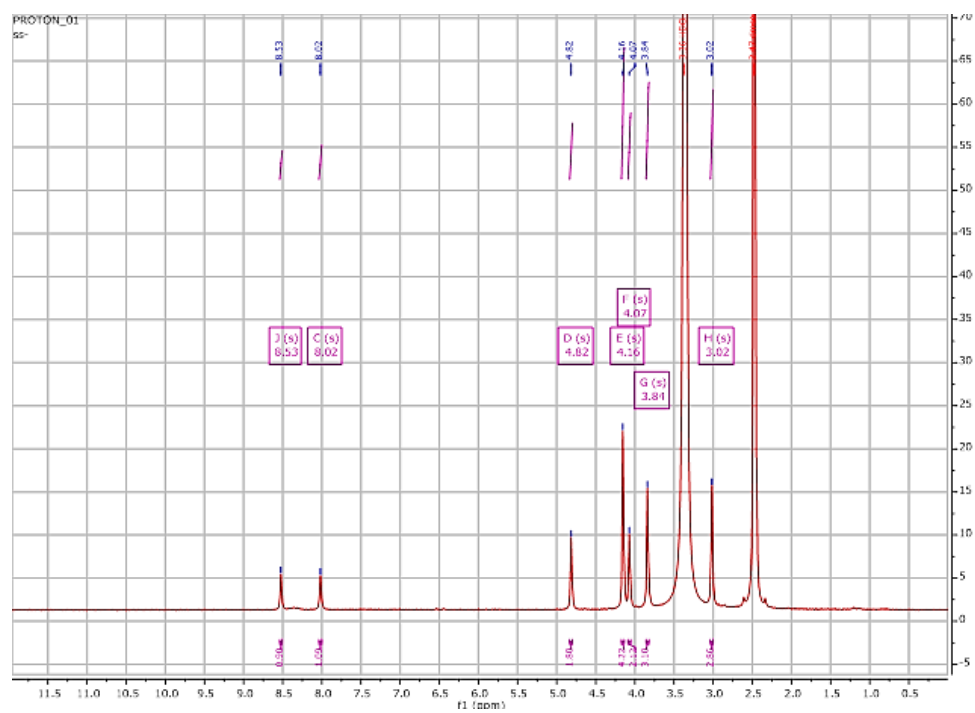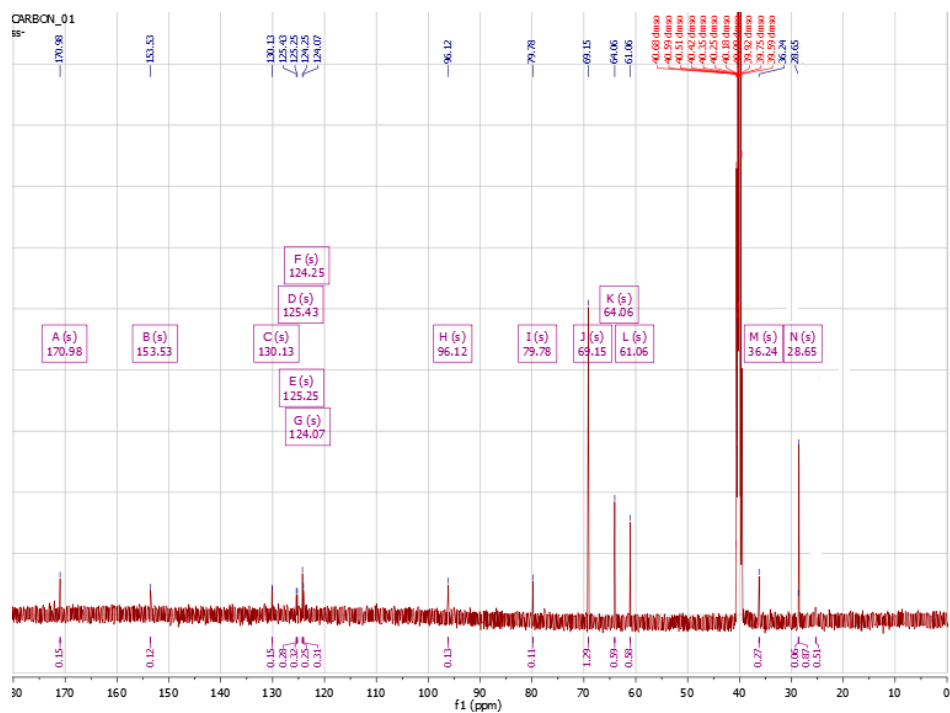

**Figure S1.** Scanned  $^1\text{H}$ - and  $^{13}\text{C}$ -NMR spectra of Methyl 5-methyl-4-(ferrocenylamino)thieno[2,3-d]pyrimidine-6-carboxylate (**2**).

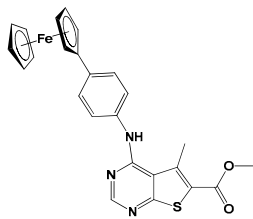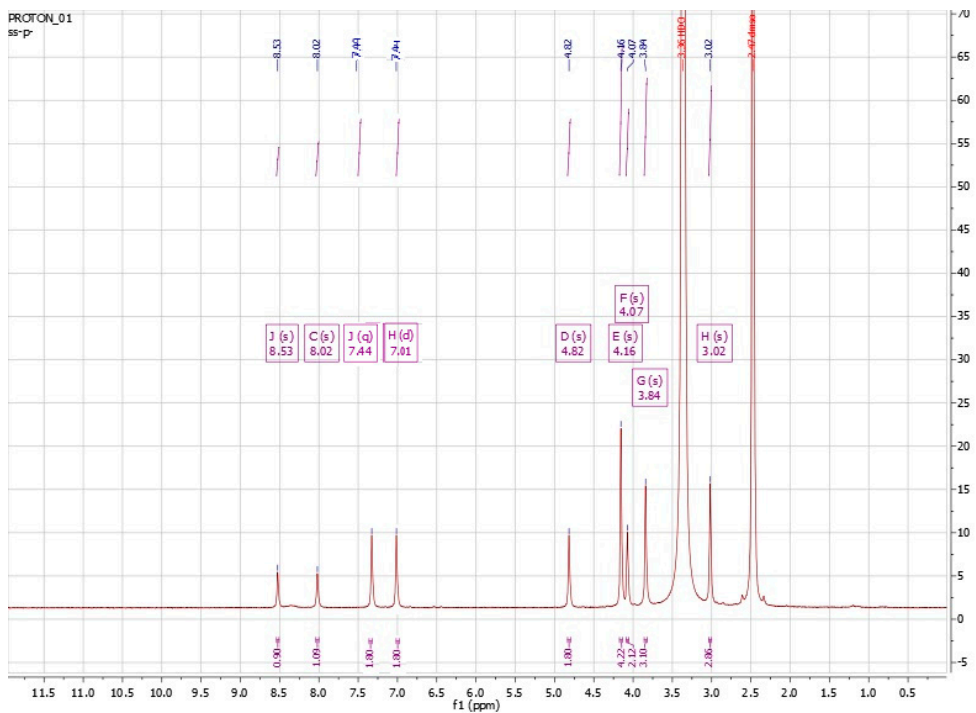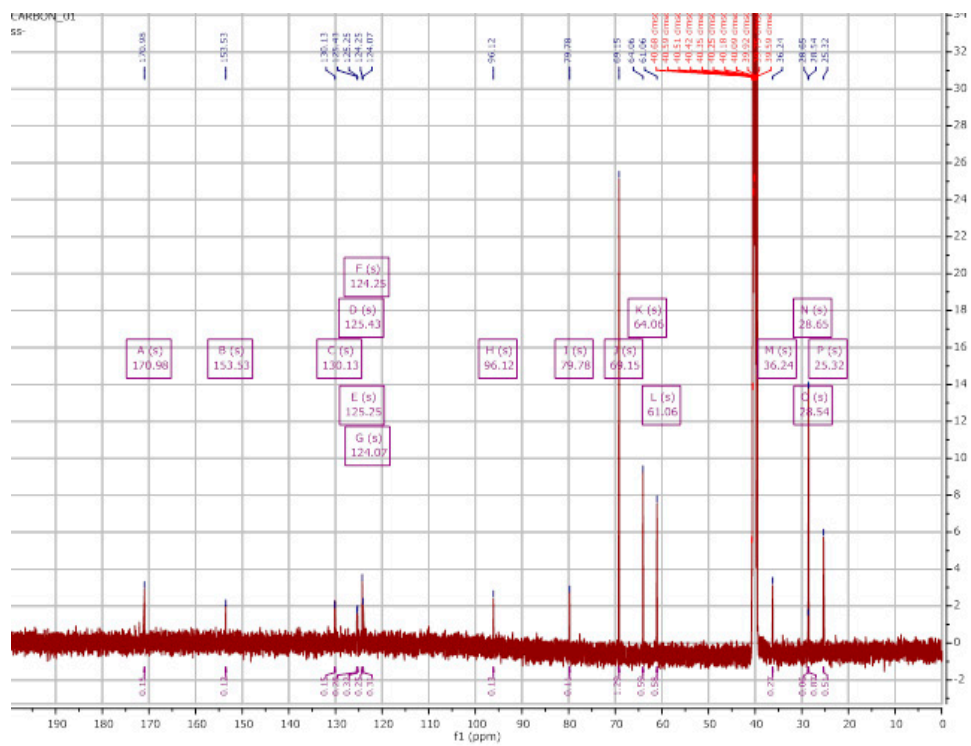

**Figure S2.** Scanned  $^1\text{H}$ - and  $^{13}\text{C}$ -NMR spectra of Methyl 4-(ferrocenyl-phenyl-4-ylamino)-5-methylthieno[2,3-d]pyrimidine-6-carboxylate (**4**).

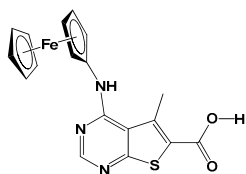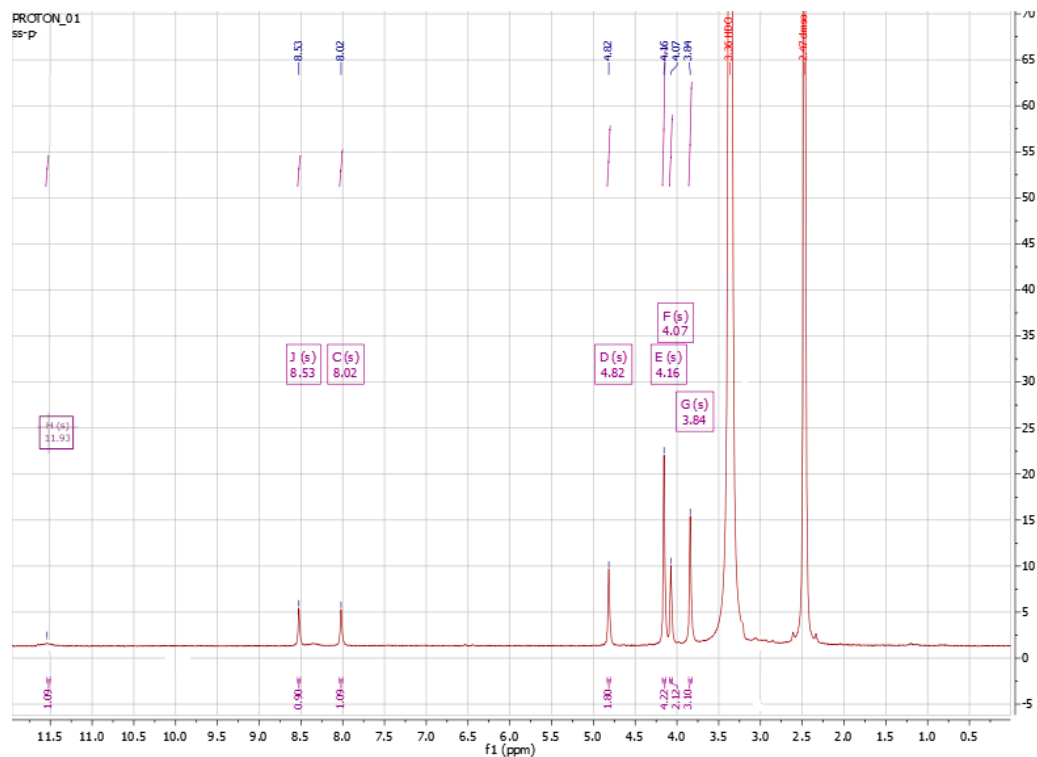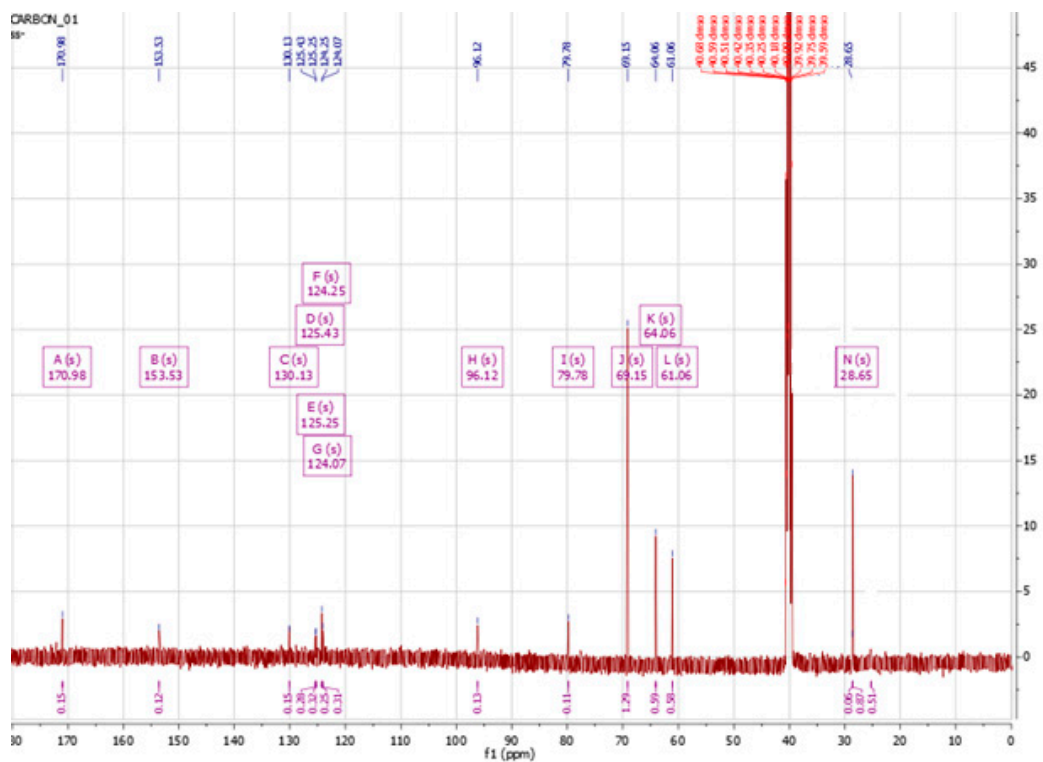

**Figure S3.** Scanned  $^1\text{H}$ - and  $^{13}\text{C}$ -NMR spectra of 5-methyl-4-(phenylamino)thieno[2,3-d]pyrimidine-6-carboxylic acid (**3**).

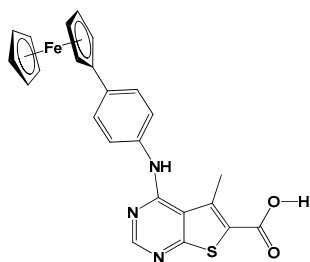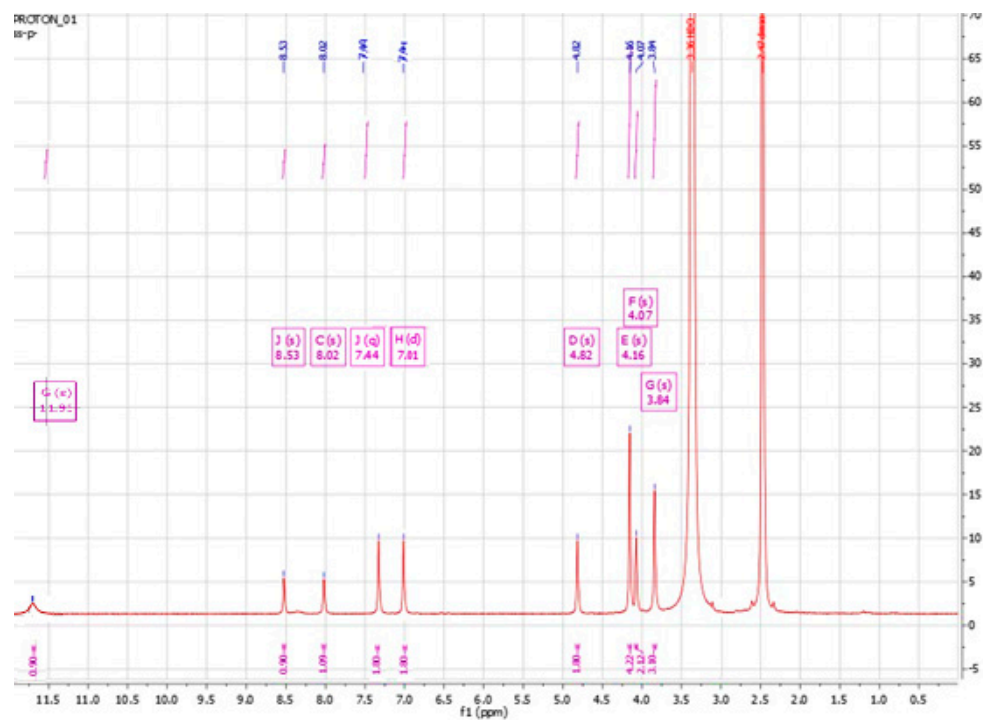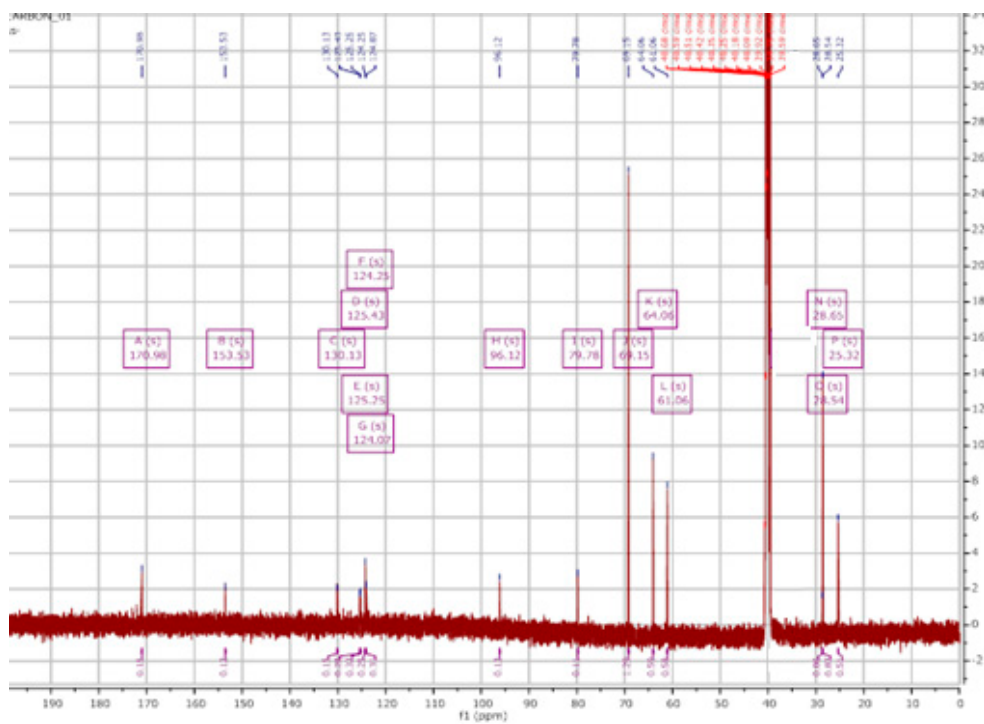

**Figure S4.** Scanned  $^1\text{H}$ - and  $^{13}\text{C}$ -NMR spectra of 4-(Ferrocenyl-phenyl-4-ylamino)-5-methylthieno[2,3-d]pyrimidine-6-carboxylic acid (5).

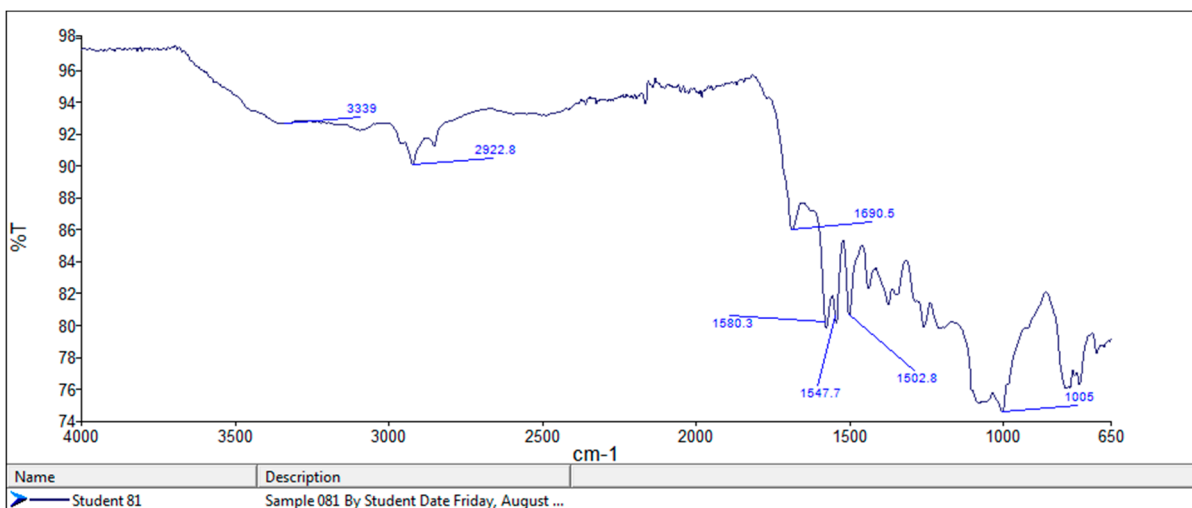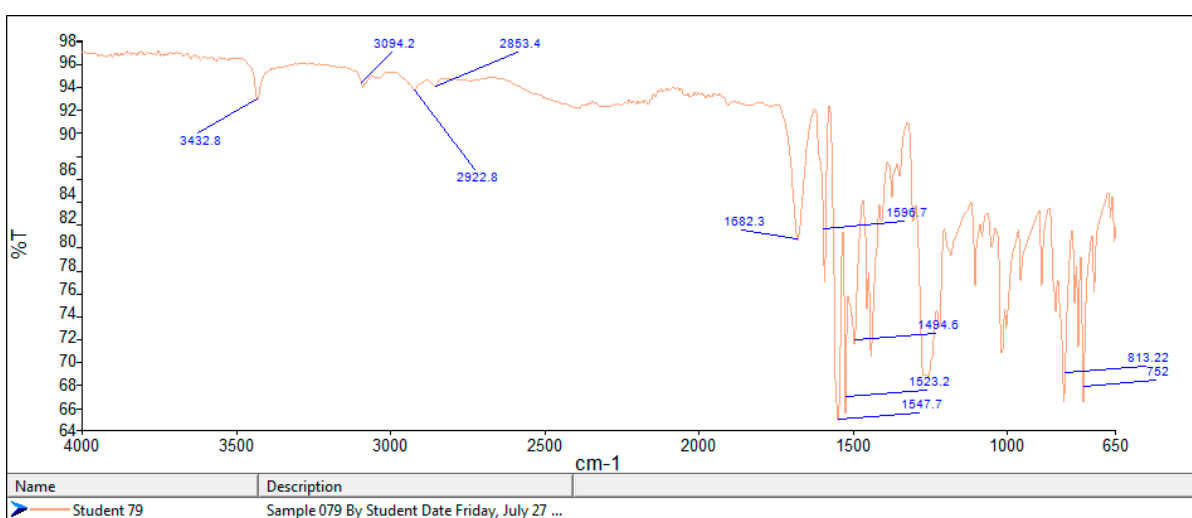

Figure S5. IR spectra of 3 and 5.
